# Supplementary material for: Spray-Dried Powder Containing Cannabigerol: A New Extemporaneous Emulgel for Topical Administration
Source: MDPI journal article supplement (doi:10.3390/pharmaceutics15122747), 2023-12-08
Supplement: s1 [file s1]

# Development of a Spray-Dried Topical Formulation Containing Cannabigerol

Alice Picco <sup>1</sup>, Lorena Segale <sup>1,2</sup>, Ivana Miletto <sup>1</sup>, Federica Pollastro <sup>1</sup>, Silvio Aprile <sup>1</sup>, Monica Locatelli <sup>1</sup>, Elia Bari <sup>1</sup>, Maria Luisa Torre <sup>1</sup> and Lorella Giovannelli <sup>1,2</sup>

## Supporting information:

Figure S1. <sup>1</sup>H NMR of CBD (A) in CDCl<sub>3</sub>, 400 MHz

Figure S2. <sup>1</sup>H NMR of CBG (B) in CDCl<sub>3</sub>, 400 MHz

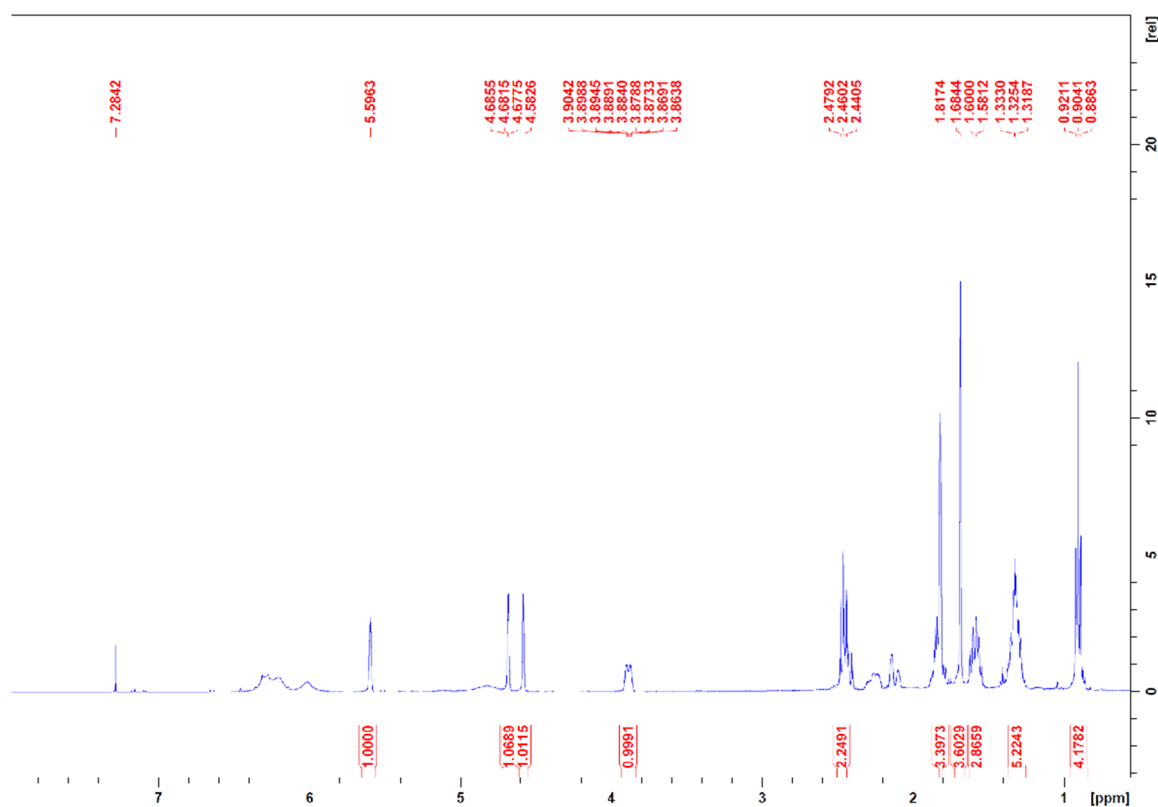

Figure S1. <sup>1</sup>H NMR of CBD (A) in CDCl<sub>3</sub>, 400 MHz.

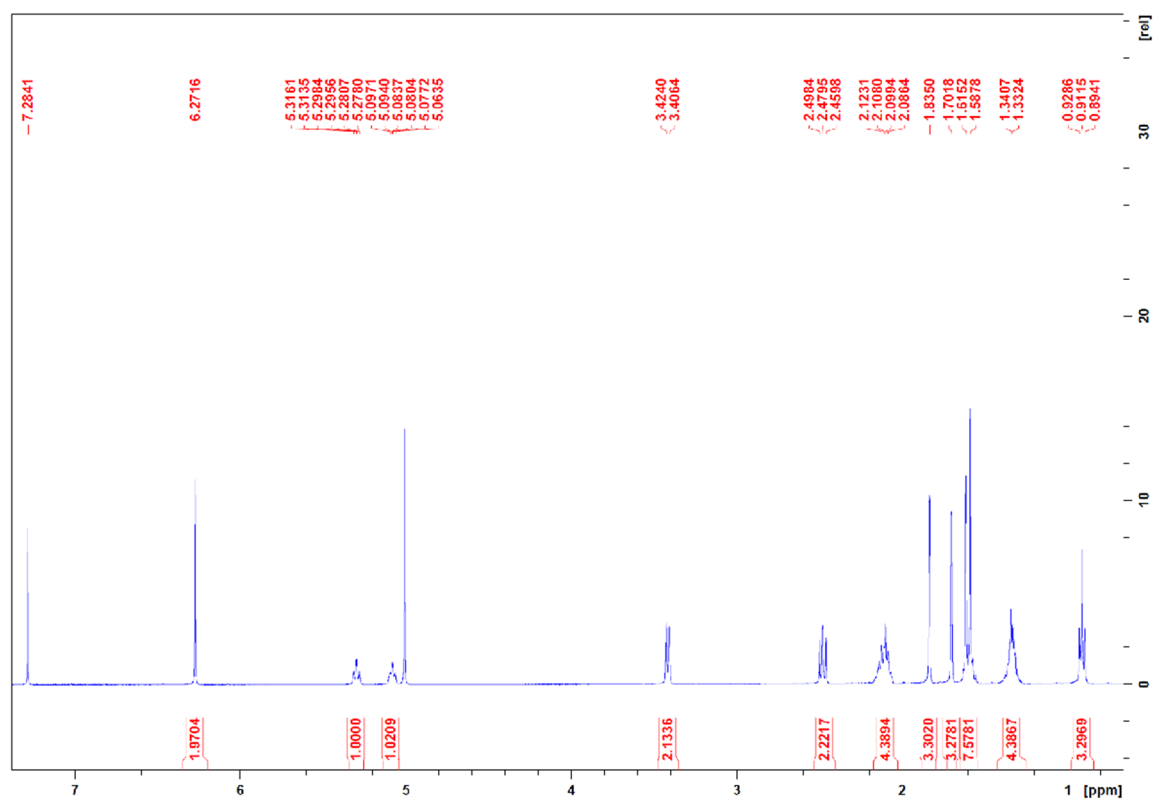

Figure S2.  $^1\text{H}$  NMR of CBG (B) in  $\text{CDCl}_3$ , 400 MHz.
